# Supplementary material
Source: Springer Nature journal article supplement (https://www.springermedizin.de/resource/supplementary/13075_2013_4133_MOESM1_ESM.pdf/9696116)

**A**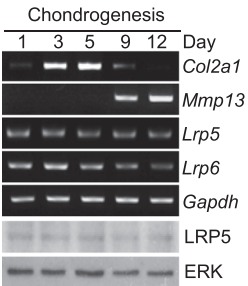**B**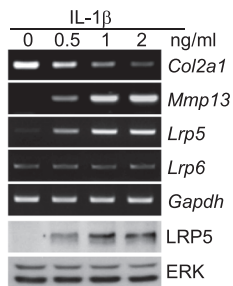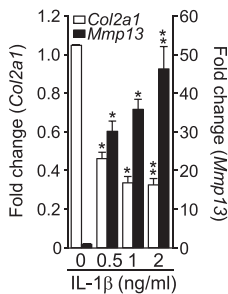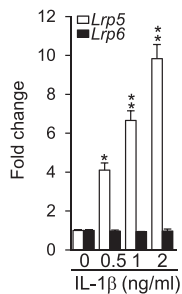**C**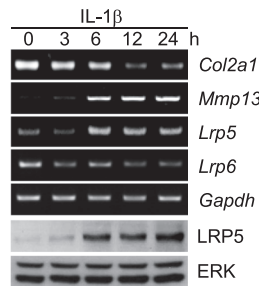**D**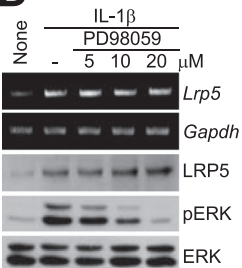**E**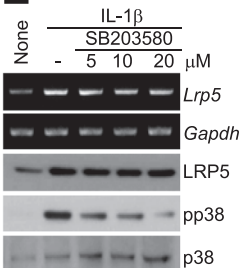**F**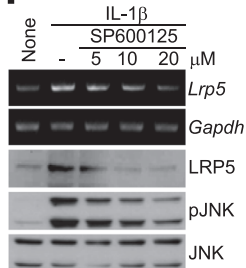**G**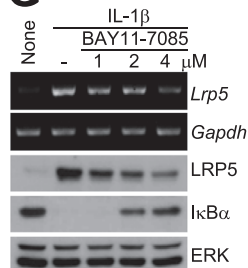

Supplement: MOESM1 [file 9696116]
